# Supplementary material for: Impact of Cancer Stem Cells on Therapy Resistance in Gastric Cancer
Source: MDPI journal article supplement (doi:10.3390/cancers14061457), 2022-03-11
Supplement: s1 [file s1]

**Table S1:** Gene glossary.

| <b>Gene Symbol</b>             | <b>Official Full Name</b>                                              | <b>Gene ID</b> |
|--------------------------------|------------------------------------------------------------------------|----------------|
| <b><i>ALDH1A1 (ALDH1)</i></b>  | Aldehyde dehydrogenase 1 family member A1                              | 216            |
| <b><i>ALDH1A3</i></b>          | Aldehyde dehydrogenase 1 family member A3                              | 220            |
| <b><i>ALDH1L1</i></b>          | Aldehyde dehydrogenase 1 family member L1                              | 10840          |
| <b><i>ALK</i></b>              | ALK receptor tyrosine kinase                                           | 238            |
| <b><i>AKT (AKT1)</i></b>       | AKT serine/threonine kinase 1                                          | 207            |
| <b><i>APC</i></b>              | APC regulator of WNT signaling pathway                                 | 324            |
| <b><i>ARID1A</i></b>           | AT-rich interaction domain 1A                                          | 8289           |
| <b><i>CCNE1</i></b>            | Cyclin E1                                                              | 898            |
| <b><i>CD133 (PROM1)</i></b>    | Prominin 1                                                             | 8842           |
| <b><i>CD166 (ALCAM)</i></b>    | Activated leukocyte cell adhesion molecule                             | 214            |
| <b><i>CD44</i></b>             | CD44 molecule                                                          | 960            |
| <b><i>CDH1</i></b>             | Cadherin 1                                                             | 999            |
| <b><i>c-FLIP (CFLAR)</i></b>   | CASP8 and FADD like apoptosis regulator                                | 8837           |
| <b><i>E2F1</i></b>             | E2F transcription factor 1                                             | 1869           |
| <b><i>EGFR</i></b>             | Epidermal growth factor receptor                                       | 1956           |
| <b><i>ERBB2 (HER2)</i></b>     | erb-b2 receptor tyrosine kinase 2                                      | 2064           |
| <b><i>ERCC1</i></b>            | ERCC excision repair 1, endonuclease non-catalytic subunit             | 2067           |
| <b><i>HMMR (CD168)</i></b>     | Hyaluronan mediated motility receptor                                  | 3161           |
| <b><i>JAK2</i></b>             | Janus kinase 2                                                         | 3717           |
| <b><i>Klf4</i></b>             | Kruppel-like factor 4                                                  | 16600          |
| <b><i>KRAS</i></b>             | KRAS proto-oncogene, GTPase                                            | 3845           |
| <b><i>LGR5</i></b>             | Leucine rich repeat containing G protein-coupled receptor 5            | 8549           |
| <b><i>MLH1</i></b>             | mutL homolog 1                                                         | 4292           |
| <b><i>MTOR</i></b>             | Mechanistic target of rapamycin kinase                                 | 2475           |
| <b><i>MYC</i></b>              | MYC proto-oncogene, bHLH transcription factor                          | 4609           |
| <b><i>PD-1 (PDCD1)</i></b>     | Programmed cell death 1                                                | 5133           |
| <b><i>PD-L1 (CD274)</i></b>    | CD274 molecule                                                         | 29126          |
| <b><i>PD-L2 (PDCD1LG2)</i></b> | Programmed cell death 1 ligand 2                                       | 80380          |
| <b><i>PIK3CA</i></b>           | Phosphatidylinositol-4,5-bisphosphate 3-kinase catalytic subunit alpha | 5290           |
| <b><i>PLK1</i></b>             | Polo like kinase 1                                                     | 5347           |
| <b><i>RHOA</i></b>             | RAS homolog family member A                                            | 387            |
| <b><i>RIF1</i></b>             | Replication timing regulatory factor 1                                 | 55183          |
| <b><i>RSK1 (RPS6KA1)</i></b>   | Ribosomal protein S6 kinase A1                                         | 6195           |
| <b><i>SMAD4</i></b>            | SMAD family member 4                                                   | 4089           |
| <b><i>Sox2</i></b>             | SRY (sex determining region Y)-box 2                                   | 20674          |
| <b><i>TP53</i></b>             | Tumor protein p53                                                      | 7157           |
| <b><i>UBE2 (UBA7)</i></b>      | Ubiquitin like modifier activating enzyme 7                            | 7318           |
| <b><i>VEGFR2 (KDR)</i></b>     | Kinase insert domain receptor                                          | 3791           |
